# Supplementary material for: Effects of synthesis methodology on microporous organic hyper-cross-linked polymers with respect to structural porosity, gas uptake performance and fluorescence properties
Source: Royal Society of Chemistry journal article supplement (doi:10.1039/c8py01730a), 2019-01-01
Supplement: c8py01730a1.pdf [file c8py01730a1.pdf]

## Supporting Information

### **Effects of Synthetic Methodology on Microporous Organic Hyper-Cross-Linked Polymers with Respect to Structural Porosity, Gas Uptake Performance and Fluorescence Properties**

Shuangshuang Hou, Shumaila Razzaque, and Bien Tan\*

Key Laboratory of Material Chemistry for Energy Conversion and Storage, Ministry of Education, Hubei Key Laboratory of Material Chemistry and Service Failure, School of Chemistry and Chemical Engineering, Huazhong University of Science and Technology, Wuhan 430074, China

\*E-mail [bien.tan@mail.hust.edu.cn](mailto:bien.tan@mail.hust.edu.cn); Tel +86-27-87558172; Fax +86-27-87543632 (B. T.).

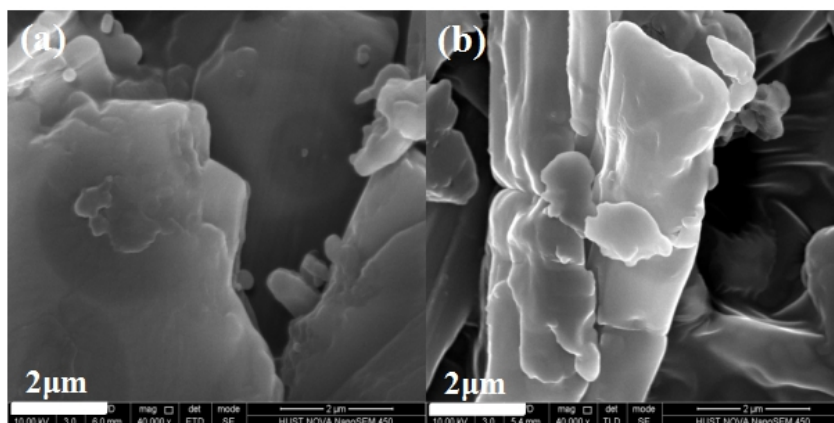

**Figure S1.** SEM images of (a) 1,4-diphenylbenzene, and (b) 1,3-diphenylbenzene at the same magnification (scale bars 2 μm).

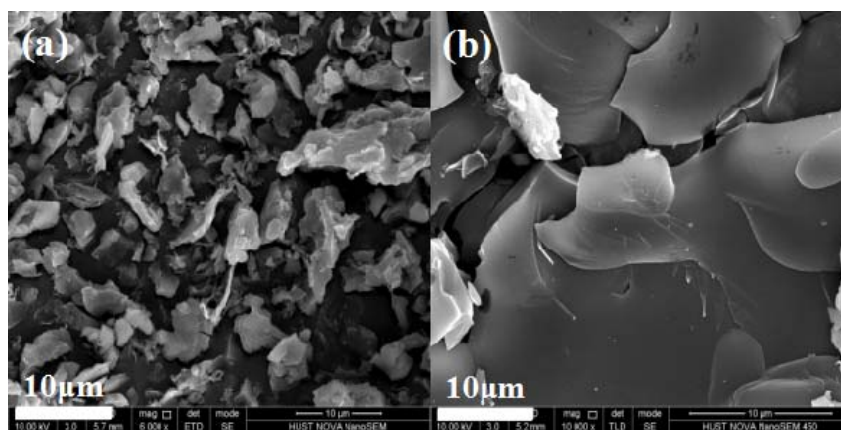

**Figure S2.** SEM images of (a) polymer 1, and (b) polymer 2 at the same magnification (scale bars 10 μm).

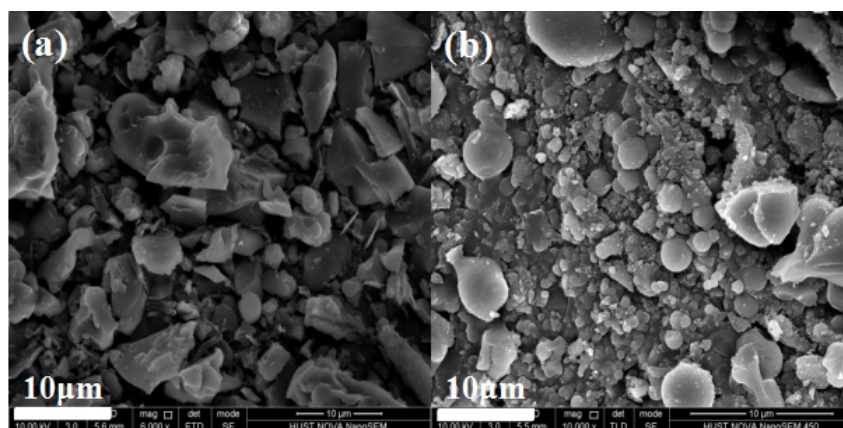

**Figure S3.** SEM images of (a) polymer 3, and (b) polymer 4 at the same magnification (scale bars 10 μm).

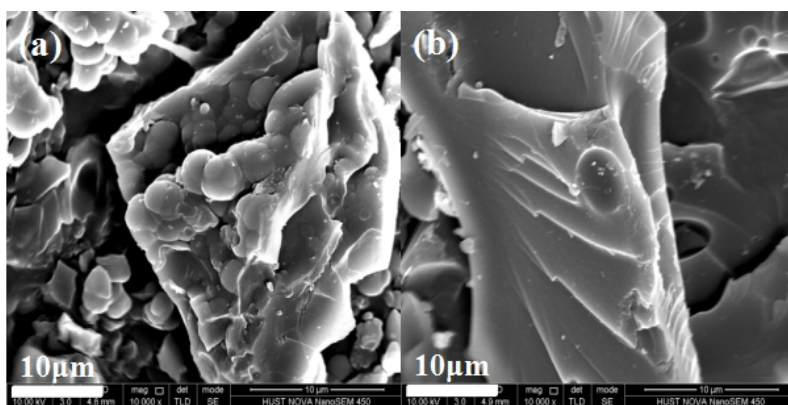

**Figure S4.** SEM images of (a) polymer 5, and (b) polymer 6 at the same magnification (scale bars 10 μm).

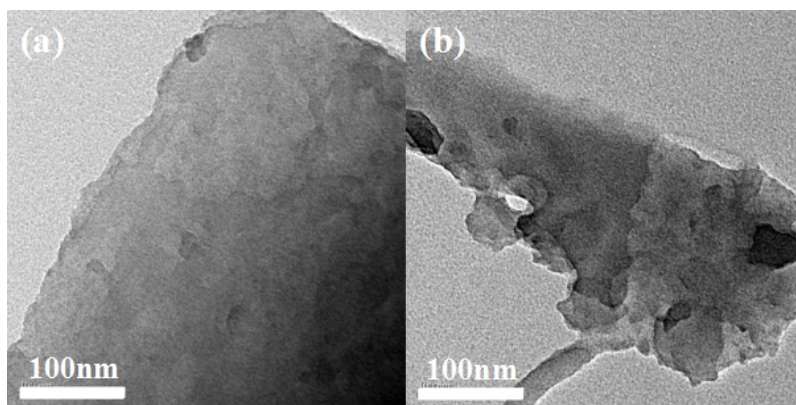

**Figure S5.** TEM images of (a) polymer 1, and (b) polymer 2 at the same magnification (scale bars 100 nm).

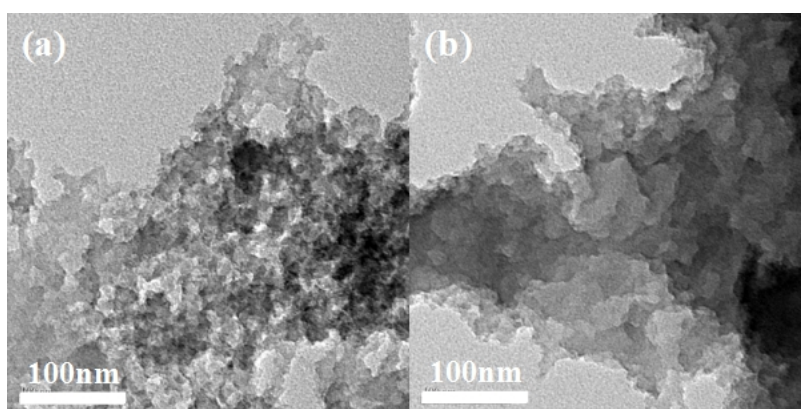

**Figure S6.** TEM images of (a) polymer 3, and (b) polymer 4 at the same magnification (scale bars 100 nm).

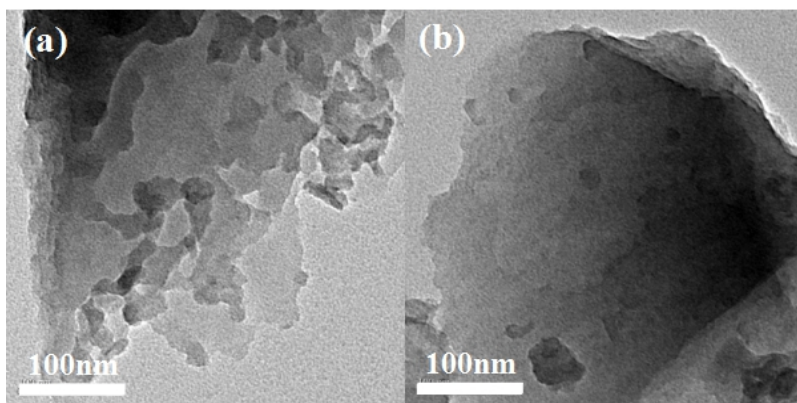

**Figure S7.** TEM images of (a) polymer 5, and (b) polymer 6 at the same magnification (scale bars 100 nm).

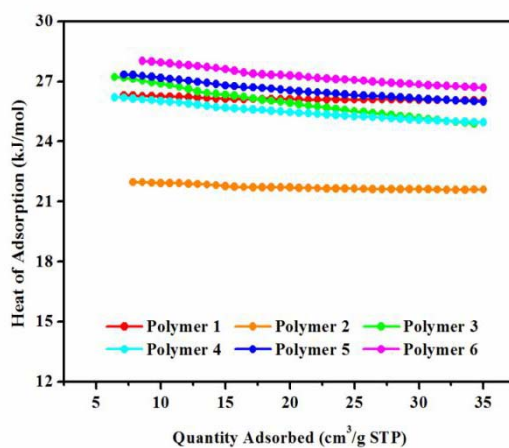

**Figure S8.** Isosteric heat of adsorption for CO<sub>2</sub> at different CO<sub>2</sub> loadings.

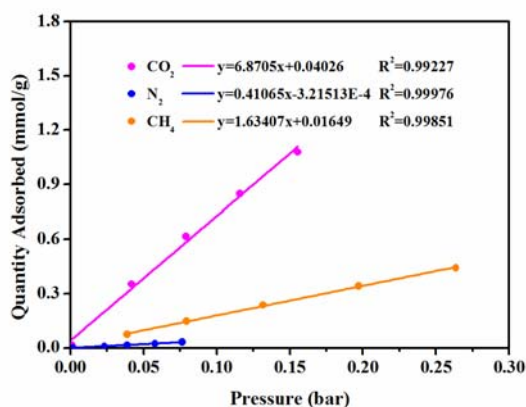

**Figure S9.** Adsorption selectivity of CO<sub>2</sub>/N<sub>2</sub> and CO<sub>2</sub>/CH<sub>4</sub> for polymer 1 calculated using Henry's law initial slope method according to the adsorption isotherms of CO<sub>2</sub> (pink), N<sub>2</sub> (blue), and CH<sub>4</sub> (orange) at 273.15 K and a low pressure coverage of less than 0.3 bar.

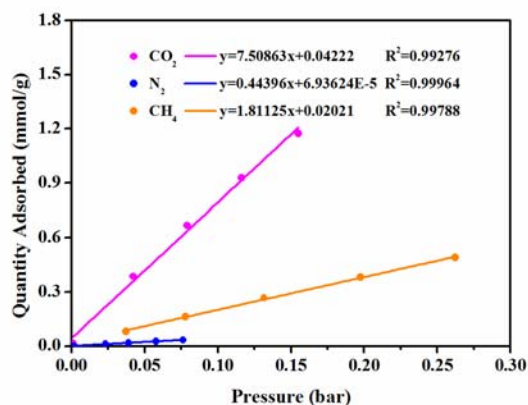

**Figure S10.** Adsorption selectivity of CO<sub>2</sub>/N<sub>2</sub> and CO<sub>2</sub>/CH<sub>4</sub> for polymer **2** calculated using Henry's law initial slope method according to the adsorption isotherms of CO<sub>2</sub> (pink), N<sub>2</sub> (blue), and CH<sub>4</sub> (orange) at 273.15 K and a low pressure coverage of less than 0.3 bar.

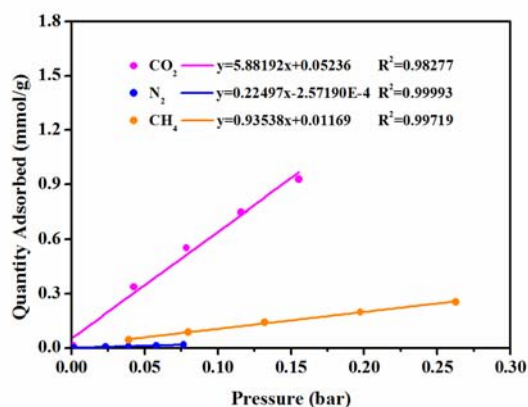

**Figure S11.** Adsorption selectivity of CO<sub>2</sub>/N<sub>2</sub> and CO<sub>2</sub>/CH<sub>4</sub> for polymer **3** calculated using Henry's law initial slope method according to the adsorption isotherms of CO<sub>2</sub> (pink), N<sub>2</sub> (blue), and CH<sub>4</sub> (orange) at 273.15 K and a low pressure coverage of less than 0.3 bar.

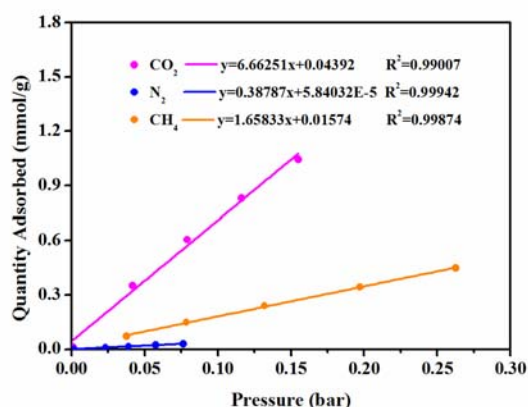

**Figure S12.** Adsorption selectivity of CO<sub>2</sub>/N<sub>2</sub> and CO<sub>2</sub>/CH<sub>4</sub> for polymer **4** calculated using Henry's law initial slope method according to the adsorption isotherms of CO<sub>2</sub> (pink), N<sub>2</sub> (blue), and CH<sub>4</sub> (orange) at 273.15 K and a low pressure coverage of less than 0.3 bar.

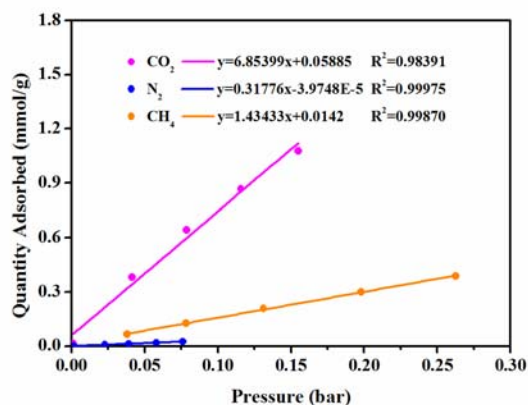

**Figure S13.** Adsorption selectivity of CO<sub>2</sub>/N<sub>2</sub> and CO<sub>2</sub>/CH<sub>4</sub> for polymer **5** calculated using Henry's law initial slope method according to the adsorption isotherms of CO<sub>2</sub> (pink), N<sub>2</sub> (blue), and CH<sub>4</sub> (orange) at 273.15 K and a low pressure coverage of less than 0.3 bar.

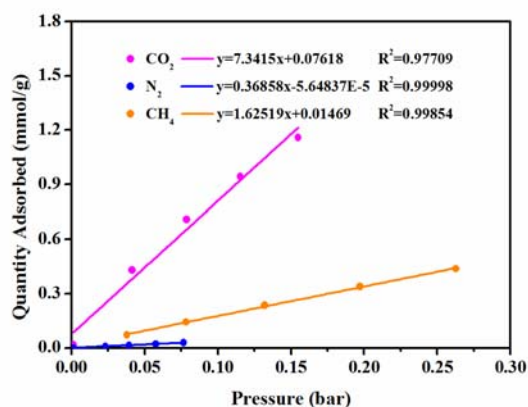

**Figure S14.** Adsorption selectivity of CO<sub>2</sub>/N<sub>2</sub> and CO<sub>2</sub>/CH<sub>4</sub> for polymer **6** calculated using Henry's law initial slope method according to the adsorption isotherms of CO<sub>2</sub> (pink), N<sub>2</sub> (blue), and CH<sub>4</sub> (orange) at 273.15 K and a low pressure coverage of less than 0.3 bar.

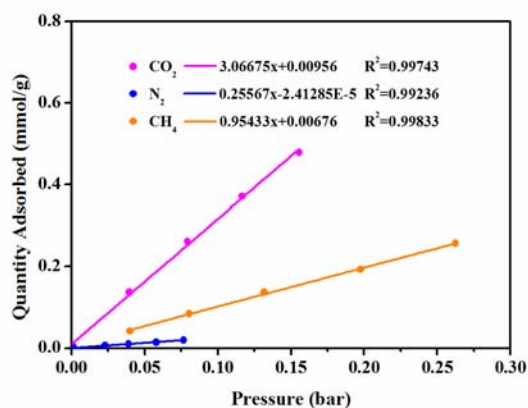

**Figure S15.** Adsorption selectivity of CO<sub>2</sub>/N<sub>2</sub> and CO<sub>2</sub>/CH<sub>4</sub> for polymer **1** calculated using Henry's law initial slope method according to the adsorption isotherms of CO<sub>2</sub> (pink), N<sub>2</sub> (blue), and CH<sub>4</sub> (orange) at 298.15 K and a low pressure coverage of less than 0.3 bar.

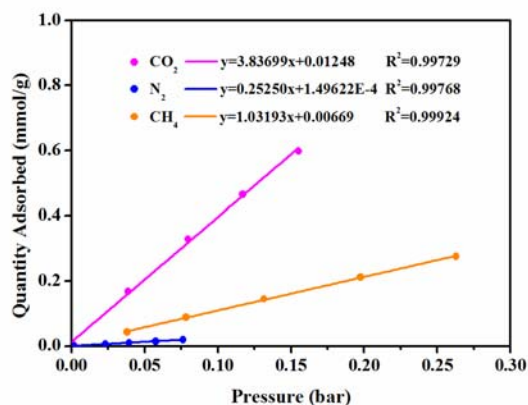

**Figure S16.** Adsorption selectivity of CO<sub>2</sub>/N<sub>2</sub> and CO<sub>2</sub>/CH<sub>4</sub> for polymer **2** calculated using Henry's law initial slope method according to the adsorption isotherms of CO<sub>2</sub> (pink), N<sub>2</sub> (blue), and CH<sub>4</sub> (orange) at 298.15 K and a low pressure coverage of less than 0.3 bar.

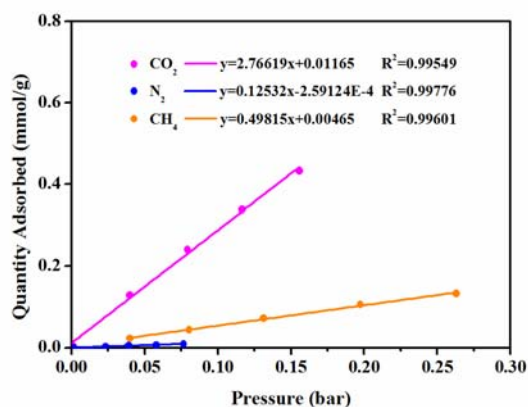

**Figure S17.** Adsorption selectivity of CO<sub>2</sub>/N<sub>2</sub> and CO<sub>2</sub>/CH<sub>4</sub> for polymer **3** calculated using Henry's law initial slope method according to the adsorption isotherms of CO<sub>2</sub> (pink), N<sub>2</sub> (blue), and CH<sub>4</sub> (orange) at 298.15 K and a low pressure coverage of less than 0.3 bar.

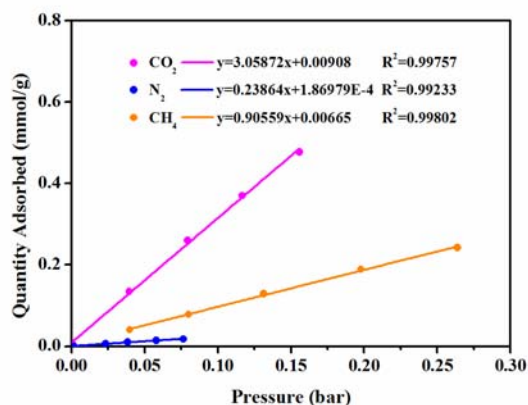

**Figure S18.** Adsorption selectivity of CO<sub>2</sub>/N<sub>2</sub> and CO<sub>2</sub>/CH<sub>4</sub> for polymer **4** calculated using Henry's law initial slope method according to the adsorption isotherms of CO<sub>2</sub> (pink), N<sub>2</sub> (blue), and CH<sub>4</sub> (orange) at 298.15 K and a low pressure coverage of less than 0.3 bar.

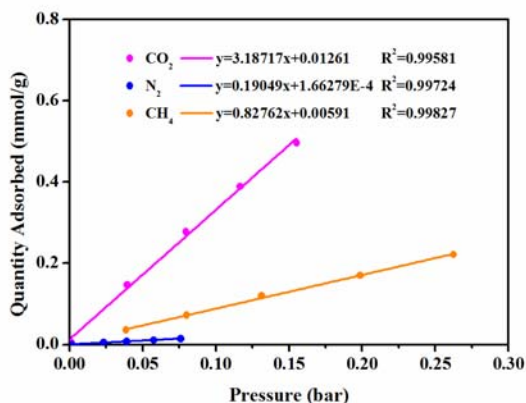

**Figure S19.** Adsorption selectivity of CO<sub>2</sub>/N<sub>2</sub> and CO<sub>2</sub>/CH<sub>4</sub> for polymer **5** calculated using Henry's law initial slope method according to the adsorption isotherms of CO<sub>2</sub> (pink), N<sub>2</sub> (blue), and CH<sub>4</sub> (orange) at 298.15 K and a low pressure coverage of less than 0.3 bar.

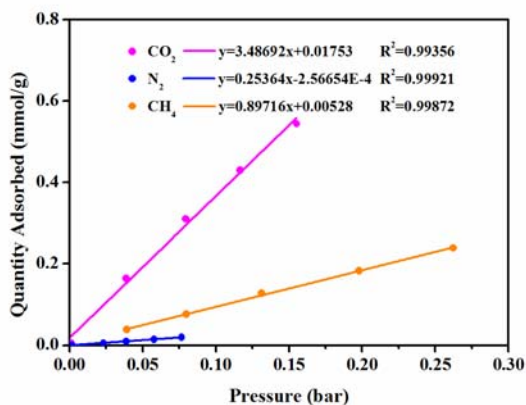

**Figure S20.** Adsorption selectivity of CO<sub>2</sub>/N<sub>2</sub> and CO<sub>2</sub>/CH<sub>4</sub> for polymer **6** calculated using Henry's law initial slope method according to the adsorption isotherms of CO<sub>2</sub> (pink), N<sub>2</sub> (blue), and CH<sub>4</sub> (orange) at 298.15 K and a low pressure coverage of less than 0.3 bar.

$$\text{Yield \%} = \frac{m_1 \text{ (g)}}{m_2 \text{ (g)}} \times 100\%$$

Where  $m_1$  is the weight of polymers **1**, **3**, and **5** measured after drying in a vacuum oven at 70 °C for 24 h,  $m_2$  is the weight of monomer 1, 4-diphenylbenzene; and  $m_1$  is the weight of polymers **2**, **4**, and **6** measured after drying in a vacuum oven at 70 °C for 24 h,  $m_2$  is the weight of monomer 1, 3-diphenylbenzene.

**Equation S1** The yield estimation of polymer materials from polymer **1** to polymer **6**.
